# Supplementary material for: Association of GSTP1 Ile105Val Polymorphism and Risk of Head and Neck Cancers: A Meta-Analysis of 28 Case-Control Studies
Source: PLOS journal article supplement (doi:10.1371/journal.pone.0048132), 2012-11-07

The flow diagram of included/excluded studies

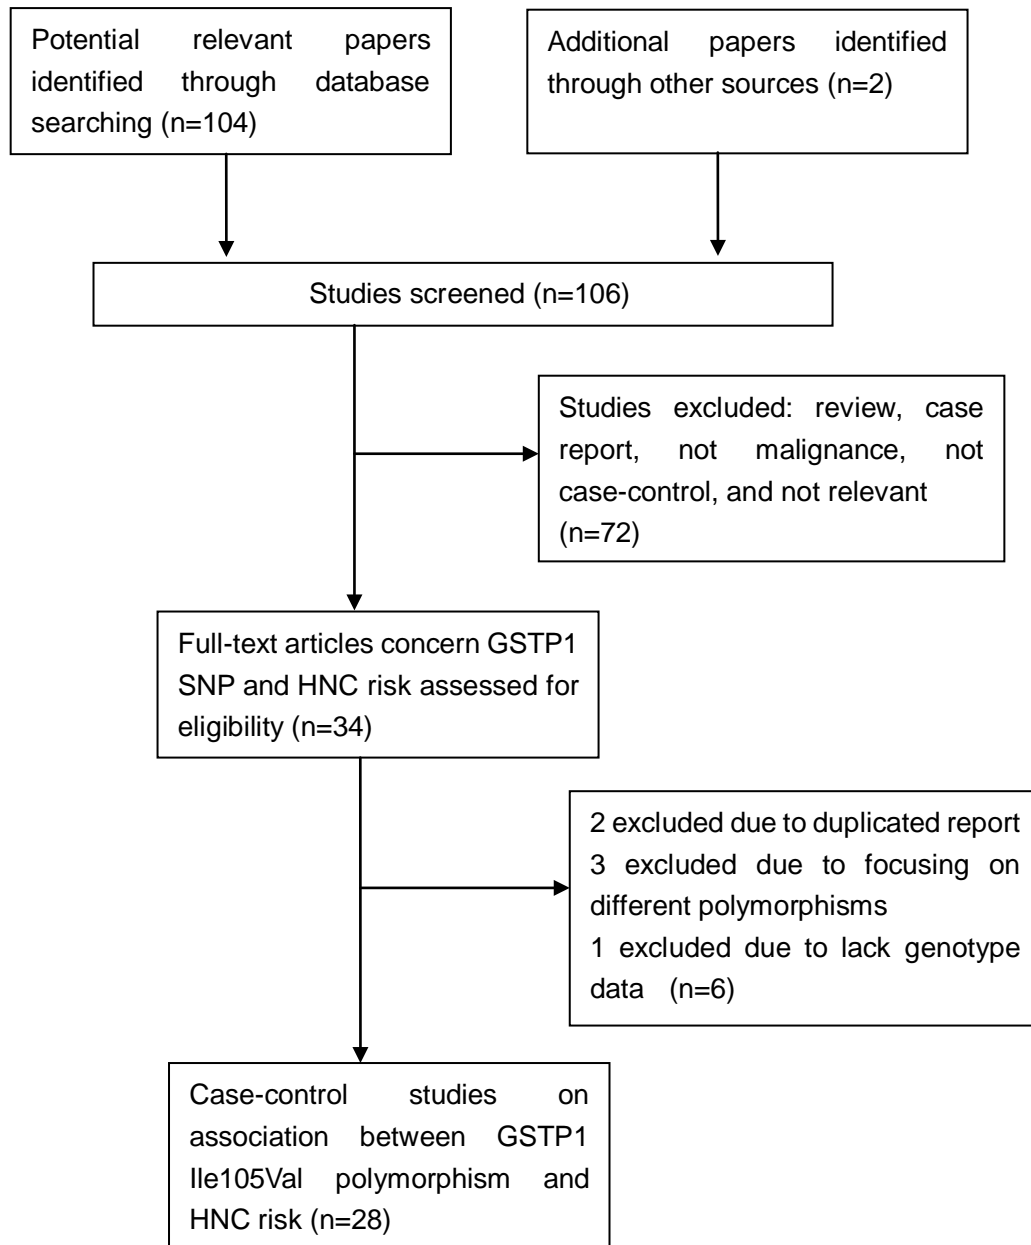

Supplement: S1 (10.1371/journal.pone.0048132.s001) [file journal.pone.0048132.s001]
